# Supplementary material
Source: HighWire-hosted journal article supplement (https://www.cmaj.ca/highwire/filestream/150080/field_highwire_adjunct_files/13/230542-res-9-at.pdf)
Supplement: 230542-res-9-at.pdf [file 230542-res-9-at.pdf]

## Appendix 9: GRADE assessment outcome

---

The most common domains for marking down GRADE confidence were risk of bias (-1), inconsistency (-1), and imprecision (-2), however groups were commonly rated up in confidence (+1) when events followed a trajectory pattern. We can be moderately confident that the true clinical course of pain and disability in people with acute and subacute low back pain is likely to be close to the estimate, however there is a possibility that it may be substantially different. We have very low confidence that the clinical course of pain and disability in people with persistent low back pain is close to the estimate.

**Table. GRADE summary of findings**

| Number of studies                                                                                                                                                                                                                                                                                                                                     | Certainty assessment       |              |                      |                            |                    |                    | Rating up  | Sample size        | Certainty |                    |
|-------------------------------------------------------------------------------------------------------------------------------------------------------------------------------------------------------------------------------------------------------------------------------------------------------------------------------------------------------|----------------------------|--------------|----------------------|----------------------------|--------------------|--------------------|------------|--------------------|-----------|--------------------|
|                                                                                                                                                                                                                                                                                                                                                       | Study design               | Risk of bias | Inconsistency        | Indirectness               | Imprecision        | Publication bias   |            |                    |           |                    |
| <b>Outcome: Pain (acute cohorts)</b>                                                                                                                                                                                                                                                                                                                  |                            |              |                      |                            |                    |                    |            |                    |           |                    |
| 31 studies                                                                                                                                                                                                                                                                                                                                            | +4                         | -1           | -1                   | 0                          | 0                  | 0                  | +1         |                    | 3         |                    |
| Bakker et al., 2007 <sup>(1)</sup>                                                                                                                                                                                                                                                                                                                    | Observational longitudinal | High         | Serious risk of bias | Some inconsistency present | No serious concern | No serious concern | Undetected | Pattern identified | 97        | Moderate certainty |
| Besen et al., 2015 <sup>(2)</sup> ; Carstens et al., 2014 <sup>(3)</sup> ; Shaw et al., 2013 <sup>(4)</sup> ; Shaw et al., 2011 <sup>(5)</sup>                                                                                                                                                                                                        |                            | High         |                      |                            |                    |                    |            |                    | 496       |                    |
| Bousema et al., 2007 <sup>(6)</sup>                                                                                                                                                                                                                                                                                                                   |                            | Moderate     |                      |                            |                    |                    |            |                    | 124       |                    |
| Breen et al., 2011 <sup>(7)</sup>                                                                                                                                                                                                                                                                                                                     |                            | High         |                      |                            |                    |                    |            |                    | 97        |                    |
| Coste et al., 1994 <sup>(8)</sup>                                                                                                                                                                                                                                                                                                                     |                            | Moderate     |                      |                            |                    |                    |            |                    | 103       |                    |
| Coste et al., 2004 <sup>(9)</sup>                                                                                                                                                                                                                                                                                                                     |                            | Moderate     |                      |                            |                    |                    |            |                    | 113       |                    |
| Elfering et al., 2014 <sup>(10)</sup> ; Melloh et al., 2011 <sup>(11)</sup> ; Melloh et al., 2012 <sup>(12)</sup> ; Melloh et al., 2013 <sup>(13)</sup> ; Melloh et al., 2013 <sup>(14)</sup> ; Melloh et al., 2013 <sup>(15)</sup> ; Melloh et al., 2013 <sup>(16)</sup> ; Melloh et al., 2015 <sup>(17)</sup> ; Melloh et al., 2015 <sup>(18)</sup> |                            | High         |                      |                            |                    |                    |            |                    | 315       |                    |
| Ferguson et al., 2000 <sup>(19)</sup> ; Ferguson et al., 2001 <sup>(20)</sup>                                                                                                                                                                                                                                                                         |                            | High         |                      |                            |                    |                    |            |                    | 32        |                    |
| Grotle et al., 2005 <sup>(21)</sup> ; Grotle et al., 2007 <sup>(22)</sup>                                                                                                                                                                                                                                                                             |                            | High         |                      |                            |                    |                    |            |                    | 123       |                    |
| Hallegraeff et al., 2020 <sup>(23)</sup> ; Hallegraeff et al., 2021 <sup>(24)</sup>                                                                                                                                                                                                                                                                   |                            | Moderate     |                      |                            |                    |                    |            |                    | 204       |                    |
| Hasenbring et al., 2012 <sup>(25)</sup>                                                                                                                                                                                                                                                                                                               |                            | Moderate     |                      |                            |                    |                    |            |                    | 177       |                    |

|                                                                                                                                                                                        |          |  |  |  |  |  |  |     |  |
|----------------------------------------------------------------------------------------------------------------------------------------------------------------------------------------|----------|--|--|--|--|--|--|-----|--|
| Hendrick et al., 2013 <sup>(26)</sup>                                                                                                                                                  | High     |  |  |  |  |  |  | 91  |  |
| Henschke et al., 2008 <sup>(27)</sup>                                                                                                                                                  | Moderate |  |  |  |  |  |  | 969 |  |
| Jenkins et al., 2022 <sup>(28)</sup> ; Jenkins et al., 2023 <sup>(29)</sup>                                                                                                            | Moderate |  |  |  |  |  |  | 120 |  |
| Klyne et al., 2018 <sup>(30)</sup> ; Klyne et al., 2020 <sup>(31)</sup> ; Klyne et al., 2020 <sup>(32)</sup> ; Klyne et al., 2022 <sup>(33)</sup> ; Klyne et al., 2022 <sup>(34)</sup> | High     |  |  |  |  |  |  | 133 |  |
| Knoop et al., 2022 <sup>(35)</sup>                                                                                                                                                     | High     |  |  |  |  |  |  | 247 |  |
| Kovacs et al., 2005 <sup>(36)</sup>                                                                                                                                                    | High     |  |  |  |  |  |  | 366 |  |
| Medeiros et al., 2018 <sup>(37)</sup>                                                                                                                                                  | Moderate |  |  |  |  |  |  | 200 |  |
| Mehling et al., 2011 <sup>(38)</sup> ; Mehling et al., 2012 <sup>(39)</sup> ; Mehling et al., 2015 <sup>(40)</sup> ; Mehling et al., 2015 <sup>(41)</sup>                              | High     |  |  |  |  |  |  | 605 |  |
| Morf et al., 2021 <sup>(42)</sup>                                                                                                                                                      | High     |  |  |  |  |  |  | 103 |  |
| Sharpe et al., 2014 <sup>(43)</sup>                                                                                                                                                    | High     |  |  |  |  |  |  | 100 |  |
| Shaw et al., 2005 <sup>(44)</sup> ; Shaw et al., 2007 <sup>(45)</sup> ; Shaw et al., 2009 <sup>(46)</sup> ; Shaw et al., 2012 <sup>(47)</sup> ; Shaw et al., 2018 <sup>(48)</sup>      | High     |  |  |  |  |  |  | 568 |  |
| Shaw et al., 2011 <sup>(49)</sup>                                                                                                                                                      | Moderate |  |  |  |  |  |  | 97  |  |
| Sieben et al., 2005 <sup>(50)</sup>                                                                                                                                                    | High     |  |  |  |  |  |  | 220 |  |
| Soares Oliveira et al., 2021 <sup>(51)</sup>                                                                                                                                           | Moderate |  |  |  |  |  |  | 600 |  |
| Starkweather et al., 2016 <sup>(52)</sup>                                                                                                                                              | High     |  |  |  |  |  |  | 48  |  |
| Suri et al., 2011 <sup>(53)</sup>                                                                                                                                                      | High     |  |  |  |  |  |  | 47  |  |
| Swinkels-Meewisse et al., 2006 <sup>(54)</sup>                                                                                                                                         | High     |  |  |  |  |  |  | 546 |  |
| Tan et al., 2018 <sup>(55)</sup>                                                                                                                                                       | Low      |  |  |  |  |  |  | 177 |  |
| Thomas and France, 2008 <sup>(56)</sup>                                                                                                                                                | High     |  |  |  |  |  |  | 43  |  |
| Zille Queiroz et al., 2017 <sup>(57)</sup> ; Felicio et al., 2021 <sup>(58)</sup> ; Teixeira et al.,                                                                                   | Moderate |  |  |  |  |  |  | 500 |  |

|                                                                                                                                                                |                            |          |                            |                            |                    |                      |            |                    |     |                    |
|----------------------------------------------------------------------------------------------------------------------------------------------------------------|----------------------------|----------|----------------------------|----------------------------|--------------------|----------------------|------------|--------------------|-----|--------------------|
| 2021 <sup>(59)</sup> ; Silva et al., 2022 <sup>(60)</sup> ; Rocha et al., 2023 <sup>(61)</sup>                                                                 |                            |          |                            |                            |                    |                      |            |                    |     |                    |
| <b>Outcome: Pain (subacute cohorts)</b>                                                                                                                        |                            |          |                            |                            |                    |                      |            |                    |     |                    |
| 8 cohorts                                                                                                                                                      | +4                         | -1       | -1                         | 0                          | 0                  | 0                    | +1         |                    | 3   |                    |
| Ben Ami et al., 2020 <sup>(62)</sup>                                                                                                                           | Observational longitudinal | High     | Serious risk of bias       | Some inconsistency present | No serious concern | No serious concern   | Undetected |                    | 150 | Moderate certainty |
| Epping-Jordan et al., 1998 <sup>(63)</sup> ; Shaw et al., 2007 <sup>(64)</sup> ; Wahlgren et al., 1997 <sup>(65)</sup> ; Williams et al., 1998 <sup>(66)</sup> |                            | Low      |                            |                            |                    |                      |            |                    | 140 |                    |
| Heneweer et al., 2007 <sup>(67)</sup>                                                                                                                          |                            | Low      |                            |                            |                    |                      |            |                    | 80  |                    |
| Karran et al., 2017 (a) <sup>(68)</sup>                                                                                                                        |                            | Low      |                            |                            |                    |                      |            |                    | 48  |                    |
| Koleck et al., 2006 <sup>(69)</sup>                                                                                                                            |                            | Moderate |                            |                            |                    |                      |            |                    | 99  |                    |
| Ranger et al., 2020 (a) <sup>(70)</sup>                                                                                                                        |                            | High     |                            |                            |                    |                      |            |                    | 203 |                    |
| Schulz et al., 2016 <sup>(71)</sup>                                                                                                                            |                            | High     |                            |                            |                    |                      |            |                    | 29  |                    |
| Shojaei et al., 2020 <sup>(72)</sup>                                                                                                                           |                            | High     |                            |                            |                    |                      |            |                    | 29  |                    |
| <b>Outcome: Pain (persistent cohorts)</b>                                                                                                                      |                            |          |                            |                            |                    |                      |            |                    |     |                    |
| 3 cohorts                                                                                                                                                      | +4                         | -1       | -1                         | 0                          | -2                 | 0                    | +1         |                    | 1   |                    |
| Costa et al., 2009 <sup>(73)</sup>                                                                                                                             | Observational longitudinal | Moderate | Moderate-high risk of bias | Some inconsistency present | No serious concern | Very serious concern | Undetected | Pattern identified | 379 | Very low certainty |
| Karran et al., 2017 (b) <sup>(68)</sup>                                                                                                                        |                            | Low      |                            |                            |                    |                      |            |                    | 132 |                    |
| Ranger et al., 2020 (b) <sup>(70)</sup>                                                                                                                        |                            | High     |                            |                            |                    |                      |            |                    | 344 |                    |
| <b>Outcome: Disability (acute cohorts)</b>                                                                                                                     |                            |          |                            |                            |                    |                      |            |                    |     |                    |
| 30 cohorts                                                                                                                                                     | +4                         | -1       | -1                         | 0                          | 0                  | 0                    | +1         |                    | 3   |                    |
| Besen et al., 2015 <sup>(2)</sup> ; Carstens et al., 2014 <sup>(3)</sup> ; Shaw et al., 2013 <sup>(4)</sup> ; Shaw et al., 2011 <sup>(5)</sup>                 | Observational longitudinal | High     | Serious risk of bias       | Some inconsistency present | No serious concern | No serious concern   | Undetected | Pattern identified | 496 | Moderate certainty |
| Bousema et al., 2007 <sup>(6)</sup>                                                                                                                            |                            | Moderate |                            |                            |                    |                      |            |                    | 124 |                    |
| Breen et al., 2011 <sup>(7)</sup>                                                                                                                              |                            | High     |                            |                            |                    |                      |            |                    | 97  |                    |
| Coste et al., 1994 <sup>(8)</sup>                                                                                                                              |                            | Moderate |                            |                            |                    |                      |            |                    | 103 |                    |
| Coste et al., 2004 <sup>(9)</sup>                                                                                                                              |                            | Moderate |                            |                            |                    |                      |            |                    | 113 |                    |

|                                                                                                                                                                                                                                                                                                                                                                               |  |          |  |  |  |  |  |  |     |  |
|-------------------------------------------------------------------------------------------------------------------------------------------------------------------------------------------------------------------------------------------------------------------------------------------------------------------------------------------------------------------------------|--|----------|--|--|--|--|--|--|-----|--|
| Elfering et al., 2014 <sup>(10)</sup> ;<br>Melloh et al., 2011 <sup>(11)</sup> ;<br>Melloh et al., 2012 <sup>(12)</sup> ;<br>Melloh et al., 2013 <sup>(13)</sup> ;<br>Melloh et al., 2013 <sup>(14)</sup> ;<br>Melloh et al., 2013 <sup>(15)</sup> ;<br>Melloh et al., 2013 <sup>(16)</sup> ;<br>Melloh et al., 2015 <sup>(17)</sup> ;<br>Melloh et al., 2015 <sup>(18)</sup> |  | High     |  |  |  |  |  |  | 315 |  |
| Ferguson et al.,<br>2000 <sup>(19)</sup> ; Ferguson et<br>al., 2001 <sup>(20)</sup>                                                                                                                                                                                                                                                                                           |  | High     |  |  |  |  |  |  | 32  |  |
| Grotle et al., 2005 <sup>(21)</sup> ;<br>Grotle et al., 2007 <sup>(22)</sup>                                                                                                                                                                                                                                                                                                  |  | High     |  |  |  |  |  |  | 123 |  |
| Hallegraeff et al.,<br>2020 <sup>(23)</sup> ; Hallegraeff et<br>al., 2021 <sup>(24)</sup>                                                                                                                                                                                                                                                                                     |  | Moderate |  |  |  |  |  |  | 204 |  |
| Hasenbring et al.,<br>2012 <sup>(25)</sup>                                                                                                                                                                                                                                                                                                                                    |  | Moderate |  |  |  |  |  |  | 177 |  |
| Hendrick et al., 2013 <sup>(26)</sup>                                                                                                                                                                                                                                                                                                                                         |  | High     |  |  |  |  |  |  | 91  |  |
| Henschke et al.,<br>2008 <sup>(27)</sup>                                                                                                                                                                                                                                                                                                                                      |  | Moderate |  |  |  |  |  |  | 969 |  |
| Jenkins et al., 2022 <sup>(28)</sup> ;<br>Jenkins et al., 2023 <sup>(29)</sup>                                                                                                                                                                                                                                                                                                |  | Moderate |  |  |  |  |  |  | 120 |  |
| Klyne et al., 2018 <sup>(30)</sup> ;<br>Klyne et al., 2020 <sup>(31)</sup> ;<br>Klyne et al., 2020 <sup>(32)</sup> ;<br>Klyne et al., 2022 <sup>(33)</sup> ;<br>Klyne et al., 2022 <sup>(34)</sup>                                                                                                                                                                            |  | High     |  |  |  |  |  |  | 133 |  |
| Kovacs et al., 2005 <sup>(36)</sup>                                                                                                                                                                                                                                                                                                                                           |  | High     |  |  |  |  |  |  | 366 |  |
| Medeiros et al., 2018 <sup>(37)</sup>                                                                                                                                                                                                                                                                                                                                         |  | Moderate |  |  |  |  |  |  | 200 |  |
| Mehling et al., 2011 <sup>(38)</sup> ;<br>Mehling et al., 2012 <sup>(39)</sup> ;<br>Mehling et al., 2015 <sup>(40)</sup> ;<br>Mehling et al., 2015 <sup>(41)</sup>                                                                                                                                                                                                            |  | High     |  |  |  |  |  |  | 605 |  |
| Morf et al., 2021 <sup>(42)</sup>                                                                                                                                                                                                                                                                                                                                             |  | High     |  |  |  |  |  |  | 103 |  |
| Reeser et al., 2001 <sup>(74)</sup>                                                                                                                                                                                                                                                                                                                                           |  | High     |  |  |  |  |  |  | 368 |  |
| Sharpe et al., 2014 <sup>(43)</sup>                                                                                                                                                                                                                                                                                                                                           |  | High     |  |  |  |  |  |  | 100 |  |
| Shaw et al., 2005 <sup>(44)</sup> ;<br>Shaw et al., 2007 <sup>(45)</sup> ;                                                                                                                                                                                                                                                                                                    |  | High     |  |  |  |  |  |  | 568 |  |

|                                                                                                                                                                                                                    |                               |          |                            |                                  |                       |                       |            |                       |     |                       |
|--------------------------------------------------------------------------------------------------------------------------------------------------------------------------------------------------------------------|-------------------------------|----------|----------------------------|----------------------------------|-----------------------|-----------------------|------------|-----------------------|-----|-----------------------|
| Shaw et al., 2009 <sup>(46)</sup> ;<br>Shaw et al., 2012 <sup>(47)</sup> ;<br>Shaw et al., 2018 <sup>(48)</sup>                                                                                                    |                               |          |                            |                                  |                       |                       |            |                       |     |                       |
| Shaw et al., 2011 <sup>(49)</sup>                                                                                                                                                                                  |                               | Moderate |                            |                                  |                       |                       |            |                       | 97  |                       |
| Sieben et al., 2002 <sup>(75)</sup>                                                                                                                                                                                |                               | High     |                            |                                  |                       |                       |            |                       | 34  |                       |
| Sieben et al., 2005 <sup>(50)</sup>                                                                                                                                                                                |                               | High     |                            |                                  |                       |                       |            |                       | 220 |                       |
| Soares Oliveira et al.,<br>2021 <sup>(51)</sup>                                                                                                                                                                    |                               | Moderate |                            |                                  |                       |                       |            |                       | 600 |                       |
| Starkweather et al.,<br>2016 <sup>(52)</sup>                                                                                                                                                                       |                               | High     |                            |                                  |                       |                       |            |                       | 48  |                       |
| Suri et al., 2011 <sup>(53)</sup>                                                                                                                                                                                  |                               | High     |                            |                                  |                       |                       |            |                       | 47  |                       |
| Swinkels-Meewisse et<br>al., 2006 <sup>(54)</sup>                                                                                                                                                                  |                               | High     |                            |                                  |                       |                       |            |                       | 546 |                       |
| Thomas and France,<br>2008 <sup>(56)</sup>                                                                                                                                                                         |                               | High     |                            |                                  |                       |                       |            |                       | 43  |                       |
| Zille Queiroz et al.,<br>2017 <sup>(57)</sup> ; Felicio et al.,<br>2021 <sup>(58)</sup> ; Teixeira et al.,<br>2021 <sup>(59)</sup> ; Silva et al.,<br>2022 <sup>(60)</sup> ; Rocha et al.,<br>2023 <sup>(61)</sup> |                               | Moderate |                            |                                  |                       |                       |            |                       | 500 |                       |
| <b>Outcome: Disability (subacute cohorts)</b>                                                                                                                                                                      |                               |          |                            |                                  |                       |                       |            |                       |     |                       |
| 8 cohorts                                                                                                                                                                                                          | +4                            | -1       | -1                         | 0                                | 0                     | 0                     | +1         |                       |     | 3                     |
| Ben Ami et al., 2020 <sup>(62)</sup>                                                                                                                                                                               | Observational<br>longitudinal | High     | Serious<br>risk of<br>bias | Some<br>inconsistency<br>present | No serious<br>concern | No serious<br>concern | Undetected | Pattern<br>identified | 150 | Moderate<br>certainty |
| Epping-Jordan et al.,<br>1998 <sup>(63)</sup> ; Shaw et al.,<br>2007 <sup>(64)</sup> ; Wahlgren et<br>al., 1997 <sup>(65)</sup> ; Williams et<br>al., 1998 <sup>(66)</sup>                                         |                               | Low      |                            |                                  |                       |                       |            |                       | 140 |                       |
| Heneweer et al.,<br>2007 <sup>(67)</sup>                                                                                                                                                                           |                               | Low      |                            |                                  |                       |                       |            |                       | 80  |                       |
| Karran et al., 2017<br>(a) <sup>(68)</sup>                                                                                                                                                                         |                               | Low      |                            |                                  |                       |                       |            |                       | 48  |                       |
| Poiraudeau et al.,<br>2006 <sup>(76)</sup>                                                                                                                                                                         |                               | Moderate |                            |                                  |                       |                       |            |                       | 443 |                       |
| Ranger et al., 2020<br>(a) <sup>(70)</sup>                                                                                                                                                                         |                               | High     |                            |                                  |                       |                       |            |                       | 203 |                       |
| Schulz et al., 2016 <sup>(71)</sup>                                                                                                                                                                                |                               | High     |                            |                                  |                       |                       |            |                       | 29  |                       |
| Shojaei et al., 2020 <sup>(72)</sup>                                                                                                                                                                               |                               | High     |                            |                                  |                       |                       |            |                       | 29  |                       |

| Outcome: Disability (persistent cohorts) |                            |          |                      |                            |                    |                      |            |                    |     |                    |
|------------------------------------------|----------------------------|----------|----------------------|----------------------------|--------------------|----------------------|------------|--------------------|-----|--------------------|
| 4 cohorts                                | +4                         | -1       |                      | -1                         | 0                  | -2                   | 0          | +1                 |     | 1                  |
| Carey et al., 2000 <sup>(77)</sup>       | Observational longitudinal | High     | Serious risk of bias | Some inconsistency present | No serious concern | Very serious concern | Undetected | Pattern identified | 96  | Very low certainty |
| Costa et al., 2009 <sup>(73)</sup>       |                            | Moderate |                      |                            |                    |                      |            |                    | 379 |                    |
| Karran et al., 2017 (b) <sup>(68)</sup>  |                            | Low      |                      |                            |                    |                      |            |                    | 132 |                    |
| Ranger et al., 2020 (b) <sup>(70)</sup>  |                            | High     |                      |                            |                    |                      |            |                    | 344 |                    |

#### References:

- Bakker EW, Verhagen AP, Lucas C, Koning HJ, Koes BW. Spinal mechanical load: a predictor of persistent low back pain? A prospective cohort study. *Eur Spine J.* 2007;16(7):933-41.
- Besen E, Young AE, Shaw WS. Returning to work following low back pain: towards a model of individual psychosocial factors. *J Occup Rehabil.* 2015;25(1):25-37.
- Carstens JK, Shaw WS, Boersma K, Reme SE, Pransky G, Linton SJ. When the wind goes out of the sail - declining recovery expectations in the first weeks of back pain. *European Journal of Pain.* 2014;18(2):269-78.
- Shaw WS, Reme SE, Pransky G, Woiszwilllo MJ, Steenstra IA, Linton SJ. The pain recovery inventory of concerns and expectations: a psychosocial screening instrument to identify intervention needs among patients at elevated risk of back disability. *J Occup Environ Med.* 2013;55(8):885-94.
- Shaw WS, Reme SE, Linton SJ, Huang YH, Pransky G. 3rd place, PREMUS best paper competition: development of the return-to-work self-efficacy (RTWSE-19) questionnaire--psychometric properties and predictive validity. *Scand J Work Environ Health.* 2011;37(2):109-19.
- Bousema EJ, Verbunt JA, Seelen HAM, Vlaeyen JWS, Knottnerus AJ. Disuse and physical deconditioning in the first year after the onset of back pain. *Pain.* 2007;130(3):279-86.
- Breen AC, Carr E, Langworthy JE, Osmond C, Worswick L. Back pain outcomes in primary care following a practice improvement intervention:- a prospective cohort study. *BMC Musculoskeletal Disorders.* 2011;12(1):28.
- Coste J, Delecoeuillerie G, Cohen de Lara A, Le Parc JM, Paolaggi JB. Clinical course and prognostic factors in acute low back pain: an inception cohort study in primary care practice. *BMJ.* 1994;308(6928):577-80.
- Coste J, Lefrançois G, Guillemin F, Pouchot J. Prognosis and quality of life in patients with acute low back pain: insights from a comprehensive inception cohort study. *Arthritis Rheum.* 2004;51(2):168-76.
- Elfering A, Käser A, Melloh M. Relationship between depressive symptoms and acute low back pain at first medical consultation, three and six weeks of primary care. *Psychology, Health & Medicine.* 2014;19(2):235-46.
- Melloh M, Elfering A, Egli Presland C, Röder C, Hendrick P, Darlow B, et al. Predicting the transition from acute to persistent low back pain. *Occup Med (Lond).* 2011;61(2):127-31.

12. Melloh M, Elfering A, Salathe CR, Kaser A, Barz T, Roder C, et al. Predictors of sickness absence in patients with a new episode of low back pain in primary care. *Ind Health*. 2012;50(4):288-98.
13. Melloh M, Salathe CR, Elfering A, Kaser A, Barz T, Aghayev E, et al. Occupational, personal and psychosocial resources for preventing persistent low back pain. *Int J Occup Saf Ergon*. 2013;19(1):29-40.
14. Melloh M, Elfering A, Kaser A, Salathe CR, Barz T, Aghayev E, et al. Depression impacts the course of recovery in patients with acute low-back pain. *Behav Med*. 2013;39(3):80-9.
15. Melloh M, Elfering A, Stanton TR, Kaser A, Salathe CR, Barz T, et al. Who is likely to develop persistent low back pain? A longitudinal analysis of prognostic occupational factors. *Work*. 2013;46(3):297-311.
16. Melloh M, Elfering A, Chapple CM, Kaser A, Rolli Salathe C, Barz T, et al. Prognostic occupational factors for persistent low back pain in primary care. *Int Arch Occup Environ Health*. 2013;86(3):261-9.
17. Melloh M, Cornwall J, Crawford RJ, Elfering A. Does injury claim status and benefit status predict low back pain outcomes? *Australas Med J*. 2015;8(8):268-76.
18. Melloh M, Elfering A, Kaser A, Rolli Salathe C, Crawford RJ, Barz T, et al. What is the best time point to identify patients at risk of developing persistent low back pain? *J Back Musculoskeletal Rehabil*. 2015;28(2):267-76.
19. Ferguson SA, Marras WS, Gupta P. Longitudinal quantitative measures of the natural course of low back pain recovery. *Spine (Phila Pa 1976)*. 2000;25(15):1950-6.
20. Ferguson SA, Gupta P, Marras WS, Heaney C. Predicting recovery using continuous low back pain outcome measures. *Spine J*. 2001;1(1):57-65.
21. Grotle M, Brox JI, Veierød MB, Glomsrød B, Lønn JH, Vøllestad NK. Clinical course and prognostic factors in acute low back pain: patients consulting primary care for the first time. *Spine (Phila Pa 1976)*. 2005;30(8):976-82.
22. Grotle M, Brox JI, Glomsrod B, Lonn JH, Vollestad NK. Prognostic factors in first-time care seekers due to acute low back pain. *European Journal of Pain*. 2007;11(3):290-8.
23. Hallegraeff JM, Kan R, van Trijffel E, Reneman MF. State anxiety improves prediction of pain and pain-related disability after 12 weeks in patients with acute low back pain: a cohort study. *J Physiother*. 2020;66(1):39-44.
24. Hallegraeff JM, van Trijffel E, Kan RW, Stenneberg MS, Reneman MF. Illness perceptions as an independent predictor of chronic low back pain and pain-related disability: a prospective cohort study. *Physiotherapy*. 2021;112:72-7.
25. Hasenbring MI, Hallner D, Klasen B, Streitlein-Böhme I, Willburger R, Rusche H. Pain-related avoidance versus endurance in primary care patients with subacute back pain: psychological characteristics and outcome at a 6-month follow-up. *Pain*. 2012;153(1):211-7.
26. Hendrick P, Milosavljevic S, Hale L, Hurley DA, McDonough SM, Herbison P, et al. Does a patient's physical activity predict recovery from an episode of acute low back pain? A prospective cohort study. *BMC Musculoskeletal Disorders*. 2013;14(1):126-.
27. Henschke N, Maher CG, Refshauge KM, Herbert RD, Cumming RG, Bleasel J, et al. Prognosis in patients with recent onset low back pain in Australian primary care: inception cohort study. *British Medical Journal*. 2008;337(7662).
28. Jenkins LC, Chang W-J, Buscemi V, Liston M, Skippen P, Cashin AG, et al. Low Somatosensory Cortex Excitability in the Acute Stage of Low Back Pain Causes Chronic Pain. *The Journal of Pain*. 2022;23(2):289-304.



29. Jenkins LC, Chang W-J, Buscemi V, Liston M, Humburg P, Nicholas M, et al. Cortical function and sensorimotor plasticity are prognostic factors associated with future low back pain after an acute episode: the Understanding persistent Pain Where it ResiDes prospective cohort study. *PAIN*. 2023;164(1):14-26.
30. Klyne DM, Barbe MF, van den Hoorn W, Hodges PW. ISSLS PRIZE IN CLINICAL SCIENCE 2018: longitudinal analysis of inflammatory, psychological, and sleep-related factors following an acute low back pain episode-the good, the bad, and the ugly. *European Spine Journal*. 2018;27(4):763-77.
31. Klyne DM, van den Hoorn W, Barbe MF, Cholewicki J, M. Hall L, Khan A, et al. Cohort profile: why do people keep hurting their back? *BMC Research Notes*. 2020;13(1):538.
32. Klyne DM, Hodges PW. Circulating Adipokines in Predicting the Transition from Acute to Persistent Low Back Pain. *Pain Medicine*. 2020;21(11):2975-85.
33. Klyne DM, Barbe MF, Hodges PW. Relationship between systemic inflammation and recovery over 12 months after an acute episode of low back pain. *Spine J*. 2022;22(2):214-25.
34. Klyne DM, Hall LM, Nicholas MK, Hodges PW. Risk factors for low back pain outcome: Does it matter when they are measured? *European Journal of Pain*. 2022;26(4):835-54.
35. Knoop J, van Lankveld W, Beijer L, Geerdink FJB, Heymans MW, Hoogeboom TJ, et al. Development and internal validation of a machine learning prediction model for low back pain non-recovery in patients with an acute episode consulting a physiotherapist in primary care. *BMC Musculoskeletal Disorders*. 2022;23(1):834.
36. Kovacs FM, Abraira V, Zamora J, Fernández C. The transition from acute to subacute and chronic low back pain: a study based on determinants of quality of life and prediction of chronic disability. *Spine (Phila Pa 1976)*. 2005;30(15):1786-92.
37. Medeiros FC, Costa LOP, Oliveira IS, Oshima RK, Costa LCM. The use of STarT BACK Screening Tool in emergency departments for patients with acute low back pain: a prospective inception cohort study. *European Spine Journal*. 2018;27(11):2823-30.
38. Mehling WE, Gopisetty V, Acree M, Pressman A, Carey T, Goldberg H, et al. Acute low back pain and primary care: how to define recovery and chronification? *Spine*. 2011;36(26):2316-23.
39. Mehling WE, Gopisetty V, Bartmess E, Acree M, Pressman A, Goldberg H, et al. The prognosis of acute low back pain in primary care in the United States: a 2-year prospective cohort study. *Spine*. 2012;37(8):678-84.
40. Mehling WE, Ebell MH, Avins AL, Hecht FM. Clinical decision rule for primary care patient with acute low back pain at risk of developing chronic pain. *Spine J*. 2015;15(7):1577-86.
41. Mehling WE, Avins AL, Acree MC, Carey TS, Hecht FM. Can a back pain screening tool help classify patients with acute pain into risk levels for chronic pain? *European Journal of Pain*. 2015;19(3):439-46.
42. Morf R, Pfeiffer F, Hotz-Boendermaker S, Meichtry A, Luomajoki H. Prediction and trend of tactile acuity, pain and disability in acute LBP: a six-month prospective cohort study. *BMC Musculoskeletal Disorders*. 2021;22(1):666.
43. Sharpe L, Haggman S, Nicholas M, Dear BF, Refshauge K. Avoidance of affective pain stimuli predicts chronicity in patients with acute low back pain. *Pain*. 2014;155(1):45-52.

44. Shaw WS, Pransky G, Patterson W, Winters T. Early disability risk factors for low back pain assessed at outpatient occupational health clinics. *Spine (Phila Pa 1976)*. 2005;30(5):572-80.
45. Shaw WS, Pransky G, Patterson W, Linton SJ, Winters T. Patient clusters in acute, work-related back pain based on patterns of disability risk factors. *J Occup Environ Med*. 2007;49(2):185-93.
46. Shaw WS, Pransky G, Winters T. The Back Disability Risk Questionnaire for work-related, acute back pain: prediction of unresolved problems at 3-month follow-up. *J Occup Environ Med*. 2009;51(2):185-94.
47. Shaw WS, Tveito TH, Woiszwilllo MJ, Pransky G. The Effect of Body Mass Index on Recovery and Return to Work After Onset of Work-Related Low Back Pain. *Journal of Occupational & Environmental Medicine*. 2012;54(2):192-7.
48. Shaw WS, Nelson CC, Woiszwilllo MJ, Gaines B, Peters SE. Early Return to Work Has Benefits for Relief of Back Pain and Functional Recovery After Controlling for Multiple Confounds. *Journal of Occupational & Environmental Medicine*. 2018;60(10):901-10.
49. Shaw WS, Pransky G, Roter DL, Winters T, Tveito TH, Larson SM. The effects of patient-provider communication on 3-month recovery from acute low back pain. *J Am Board Fam Med*. 2011;24(1):16-25.
50. Sieben JM, Vlaeyen JW, Portegijs PJ, Verbunt JA, van Riet-Rutgers S, Kester AD, et al. A longitudinal study on the predictive validity of the fear-avoidance model in low back pain. *Pain*. 2005;117(1-2):162-70.
51. Soares Oliveira I, da Silva T, Costa LOP, Medeiros FC, Oshima RKA, de Freitas DG, et al. The Long-Term Prognosis in People With Recent Onset Low Back Pain From Emergency Departments: An Inception Cohort Study. *J Pain*. 2021;22(11):1497-505.
52. Starkweather AR, Lyon DE, Kinser P, Heineman A, Sturgill JL, Deng X, et al. Comparison of Low Back Pain Recovery and Persistence. *Biological Research for Nursing*. 2016;18(4):401-10.
53. Suri P, Rainville J, Fitzmaurice GM, Katz JN, Jamison RN, Martha J, et al. Acute low back pain is marked by variability: An internet-based pilot study. *BMC Musculoskeletal Disorders*. 2011;12(1):220.
54. Swinkels-Meewisse IE, Roelofs J, Schouten EG, Verbeek AL, Oostendorp RA, Vlaeyen JW. Fear of movement/(re)injury predicting chronic disabling low back pain: a prospective inception cohort study. *Spine (Phila Pa 1976)*. 2006;31(6):658-64.
55. Tan CIC, Liaw JSC, Jiang B, Pothiwala SE, Li H, Leong MKF. Predicting outcomes of acute low back pain patients in emergency department: A prospective observational cohort study. *Medicine*. 2018;97(22):e11247-e.
56. Thomas JS, France CR. The relationship between pain-related fear and lumbar flexion during natural recovery from low back pain. *Eur Spine J*. 2008;17(1):97-103.
57. Zille Queiroz B, Sirineu Pereira D, de Britto Rosa NM, Antunes Lopes R, Pereira Andrade AG, Carvalho Felício D, et al. Inflammatory Mediators and Pain in the First Year After Acute Episode of Low-Back Pain in Elderly Women: Longitudinal Data from Back Complaints in the Elders--Brazil. *American Journal of Physical Medicine & Rehabilitation*. 2017;96(8):535-40.
58. Felício DC, Elias Filho J, Pereira DS, Queiroz BZ, Leopoldino AAO, Rocha VTM, et al. The effect of kinesiophobia in older people with acute low back pain: longitudinal data from Back Complaints in the Elders (BACE). *Cad Saude Publica*. 2021;37(12):e00232920.
59. Teixeira LF, Diz JBM, Moreira BdS, Silva SLAd, Dias JMD, Pereira LSM, et al. Attitudes and beliefs of older adults with acute low back pain: 12-month results from the Brazilian cohort back complaints in the elders. *Musculoskeletal Care*. 2021;n/a(n/a).

60. Silva JPd, de Jesus-Moraleida FR, Felício DC, Andrade AGPd, Pereira DS, Ferreira ML, et al. Trajectories of pain and disability in older adults with acute low back pain: Longitudinal data of the BACE-Brazil cohort. *Brazilian Journal of Physical Therapy*. 2022;26(1):100386.
61. Rocha VTM, Leopoldino AAO, de Queiroz BZ, Lopes RA, da Silva SLA, Diz JBM, et al. The impact of low back pain and disability on frailty levels in older women: longitudinal data from the BACE-Brazil cohort. *European Geriatric Medicine*. 2023;14(1):181-9.
62. Ben Ami N, Weisman A, Yona T, Shashua A, Hill J, Pincus T. STarT back tool retained its predicting abilities in patients with acute and sub-acute low back pain after a transcultural adaptation and validation to Hebrew. *Musculoskelet Sci Pract*. 2020;46:102134.
63. Epping-Jordan JE, Wahlgren DR, Williams RA, Pruitt SD, Slater MA, Patterson TL, et al. Transition to chronic pain in men with low back pain: predictive relationships among pain intensity, disability, and depressive symptoms. *Health Psychol*. 1998;17(5):421-7.
64. Shaw WS, Means-Christensen A, Slater MA, Patterson TL, Webster JS, Atkinson JH. Shared and independent associations of psychosocial factors on work status among men with subacute low back pain. *Clin J Pain*. 2007;23(5):409-16.
65. Wahlgren DR, Atkinson JH, Epping-Jordan JE, Williams RA, Pruitt SD, Klapow JC, et al. One-year follow-up of first onset low back pain. *Pain*. 1997;73(2):213-21.
66. Williams RA, Pruitt SD, Doctor JN, Epping-Jordan JE, Wahlgren DR, Grant I, et al. The contribution of job satisfaction to the transition from acute to chronic low back pain. *Arch Phys Med Rehabil*. 1998;79(4):366-74.
67. Heneweer H, Aufdemkampe G, van Tulder MW, Kiers H, Stappaerts KH, Vanhees L. Psychosocial variables in patients with (sub)acute low back pain: an inception cohort in primary care physical therapy in The Netherlands. *Spine (Phila Pa 1976)*. 2007;32(5):586-92.
68. Karran EL, Traeger AC, McAuley JH, Hillier SL, Yau YH, Moseley GL. The Value of Prognostic Screening for Patients With Low Back Pain in Secondary Care. *J Pain*. 2017;18(6):673-86.
69. Koleck M, Mazaux JM, Rascle N, Bruchon-Schweitzer M. Psycho-social factors and coping strategies as predictors of chronic evolution and quality of life in patients with low back pain: a prospective study. *Eur J Pain*. 2006;10(1):1-11.
70. Ranger TA, Cicuttini FM, Jensen TS, Manniche C, Heritier S, Urquhart DM. Catastrophization, fear of movement, anxiety, and depression are associated with persistent, severe low back pain and disability. *Spine J*. 2020;20(6):857-65.
71. Schulz P, Prescott J, Shifman J, Fiore J, Jr., Holland A, Harding P. Comparing patient outcomes for care delivered by advanced musculoskeletal physiotherapists with other health professionals in the emergency department-A pilot study. *Australas Emerg Nurs J*. 2016;19(4):198-202.
72. Shojaei I, Salt EG, Bazrgari B. A prospective study of lumbo-pelvic coordination in patients with non-chronic low back pain. *J Biomech*. 2020;102:109306.
73. Costa Lda C, Maher CG, McAuley JH, Hancock MJ, Herbert RD, Refshauge KM, et al. Prognosis for patients with chronic low back pain: inception cohort study. *BMJ*. 2009;339:b3829.
74. Reeser JC, Wiegmann SM, Hoover N, Oldridge N, Phillips D, Bjelland T, et al. Treatment of acute low back pain in Wisconsin: results of the State Medical Society's Medical Outcomes Research Project. *Wmj*. 2001;100(8):35-42.
75. Sieben JM, Vlaeyen JW, Tuerlinckx S, Portegijs PJ. Pain-related fear in acute low back pain: the first two weeks of a new episode. *Eur J Pain*. 2002;6(3):229-37.

76. Poiraudreau S, Rannou F, Baron G, Henanff AL, Coudeyre E, Rozenberg S, et al. Fear-avoidance beliefs about back pain in patients with subacute low back pain. *Pain*. 2006;124(3):305-11.
77. Carey TS, Garrett JM, Jackman AM. Beyond the good prognosis. Examination of an inception cohort of patients with chronic low back pain. *Spine (Phila Pa 1976)*. 2000;25(1):115-20.
